# Supplementary material for: Oxygen as a promoter for efficient degradation of organic pollutants by high-temperature and high-pressure electrochemistry
Source: Royal Society of Chemistry journal article supplement (doi:10.1039/b702198d), 2007-01-01
Supplement: b702198d.pdf [file b702198d.pdf]

**Oxygen as a Promoter for Efficient Degradation of Organic Pollutants by High  
Temperature and High Pressure Electrochemistry**

Minghua Zhou <sup>\*</sup>, Lecheng Lei, Qizhou Dai

*Department of Environmental Science, Zhejiang University, Hangzhou 310028, China*

**Total number of pages (including the cover page):**

9 pages

**List of Figures:**

|                                                            |        |
|------------------------------------------------------------|--------|
| Fig. S1. The experimental setup.                           | Page 2 |
| Fig. S2. Structural of Cationic Red X-GRL.                 | Page 3 |
| Fig. S3. The synergetic factors at different temperatures. | Page 4 |
| Fig. S4. The GC/MS spectra for two processes.              | Page 5 |
| Fig. S5. The degradation pathway for two processes.        | Page 6 |

**List of Tables:**

|                                                                      |        |
|----------------------------------------------------------------------|--------|
| Tab. S1. Effect of initial dye concentration on dye and COD removal. | Page 8 |
| Tab. S2. The main degradation intermediates by two processes.        | Page 9 |

---

\* Corresponding author. Tel.: +86 571 88273090; fax: +86 571 88273369  
E-mail address: [skynumen@yahoo.com](mailto:skynumen@yahoo.com) (M. H. Zhou).

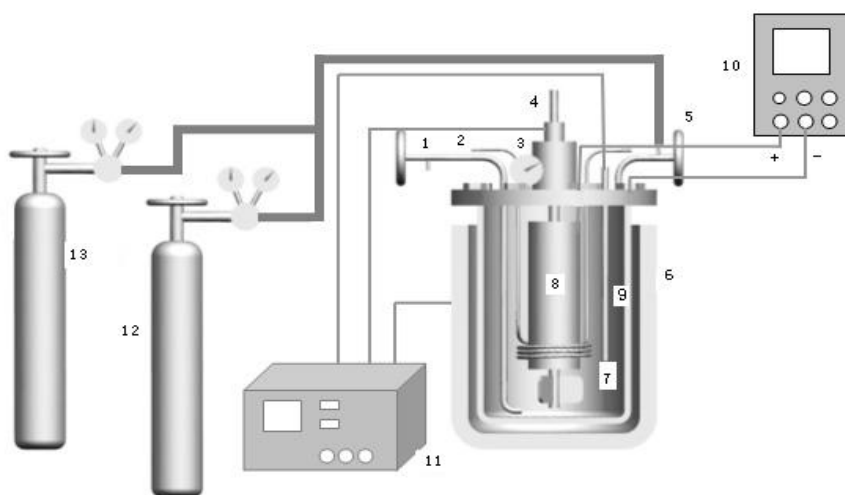

**Figure S1.** The experiment set-up

1 sample inlet and sampling pipe; 2 cooling water inlet; 3 pressure gauge; 4 stirring system;  
5 gas outlet; 6 electric heating jacket; 7 temperature sensor; 8 anode; 9 cathode;  
10 DC supply; 11 reactor controller; 12 oxygen; 13 nitrogen.

# Supplementary Material (ESI) for Chemical Communications  
# This journal is (c) The Royal Society of Chemistry 2007

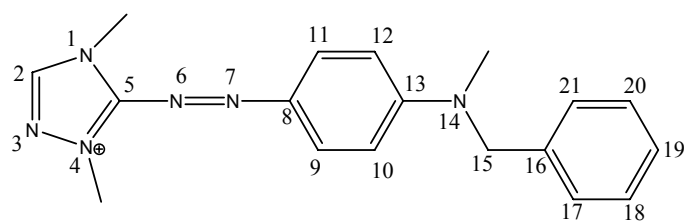

**Figure S2.** Structural of cationic red X-GRL

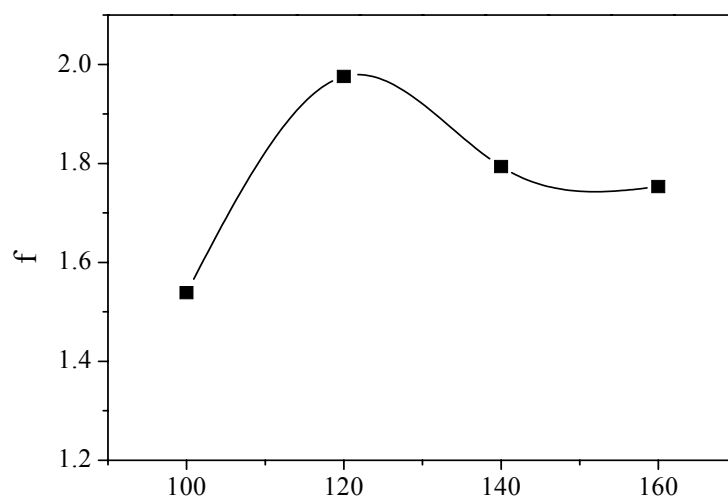

**Figure S3.** The synergetic factors at different temperatures.

**Conditions:** PNP 1000 mg L<sup>-1</sup>, 160 °C, oxygen 0.5 MPa, current 0.5 A, Na<sub>2</sub>SO<sub>4</sub> 3 g L<sup>-1</sup>, treated time 120 min.

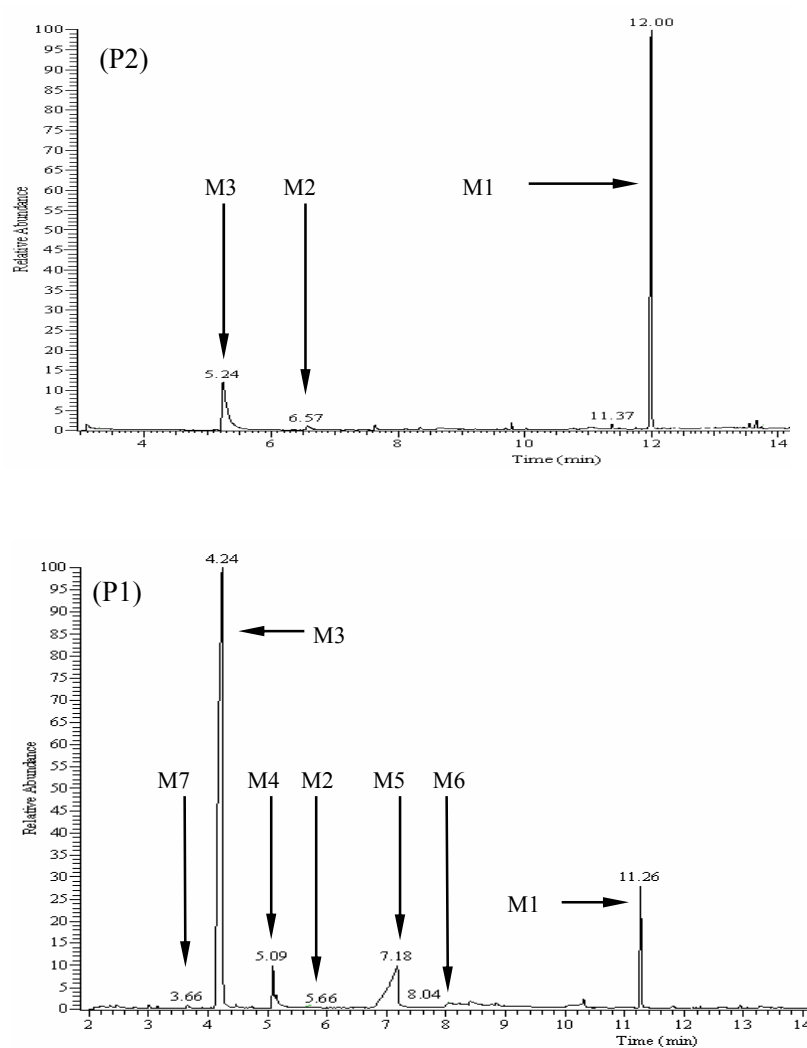

Figure S4. The GC/MS spectra for two processes.

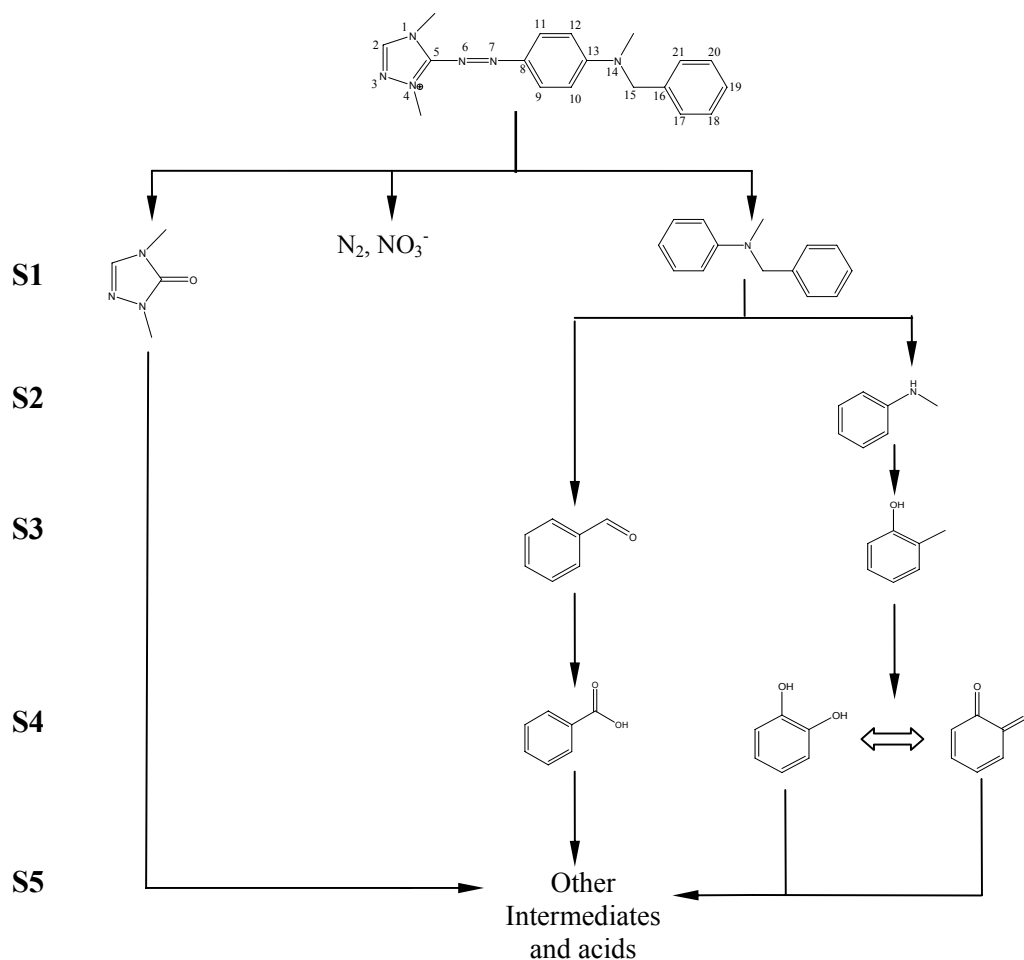

**Figure S5.** The degradation pathway for two processes.

In P2, the attack of the azo bond would be the initial step of dye degradation, which led to the rapid removal of color. In the bond (-C-N=N-), the length of the bond of C(5)-N(6), N(6)-N(7) and N(7)-C(8) is 1.456 Å, 1.362 Å and 1.404 Å, respectively, which indicated C(5)-N(6) would be the first potential broken among the three as for stability. The radical would attack this site and result in the release of nitrogen element and the formation of 2,4-dimethyl-2,4-dihydro-[1,2,4] triazol-3-one, which was identified in our previous work though it might be missed in the analysis

# Supplementary Material (ESI) for Chemical Communications  
# This journal is (c) The Royal Society of Chemistry 2007

in the present work. However, it was confirmed that  $\text{NO}_2^-$  was not detected in the solution, while  $\text{NO}_3^-$  was very low (below 2 mg/L), which was much less than the theoretic calculation from the broken of azo bond. In literatures, it reported a degradation pathway for azo dye through the formation of molecular nitrogen (1). In the present work, we deduced that the degradation might also proceed in this way. The broken of azo group from the parent substance would result in the formation of the benzenamine, N-phenylmethlene diazene radical, which would be unstable and then turned into benzenamine, N-phenylmethlene by release of molecular nitrogen. After the broken of the azo dye to form M1, the hydroxyl radical attack would lead to the broken down of N(14)-C(15), which led to the formation of M2 and M3. Due to the relatively lower COD removal, it could be deduced that the decolorization of azo bond broken was relatively easy but the further degradation intermediates to organic acids would be rather difficult. According to the products and their amounts, the P2 goes forward to at most stage 2 or 3 (S3).

In P1, the formed products of M3 further oxidized to Benzoic acid (M5) by hydroxyl radical replacement. The attack of hydroxyl radical on the N(14), would led to the rearrangement of methyl to the activated sites of C(10) or C(12) while release the nitrogen to the final formation of nitrate in the aqueous solution. In this way, the product of 2-methyl-phenol (M4) formed. The attack of hydroxyl radical would take instead of methyl group to form hydroquinone (M6), which would be converted to benzoquinone (M7) by hydrogen addict. These products would be further degraded to form other intermediates and organic acids. In this way, the P1 goes forward to stage 5 (S5), which lead to a much deeper degradation.

#### References:

- (1) Spadaro, J. T.; Isabelle, L.; Renganathan V. Hydroxyl radical mediated degradation of azo dyes: evidence for benzene generation. *Environ. Sci. Technol.* **1994**, *28*, 1389-1393.

# Supplementary Material (ESI) for Chemical Communications  
# This journal is (c) The Royal Society of Chemistry 2007



Table S1. Effect of initial dye concentration on dye and COD removal.

| Initial concentration | P2        | P1   |      |
|-----------------------|-----------|------|------|
| dye*                  | 500 mg/L  | 20.1 | 98.5 |
|                       | 1000 mg/L | 9.1  | 96.5 |
|                       | 2000 mg/L | 3.5  | 95.8 |
| COD**                 | 500 mg/L  | 15.8 | 43.2 |
|                       | 1000 mg/L | 9.2  | 39.1 |
|                       | 2000 mg/L | 5.1  | 36.4 |

Conditions: P1: pH 5.0, I 0.5 A, Na<sub>2</sub>SO<sub>4</sub> 3 g/L, O<sub>2</sub> 0.5 MPa, T 160 °C;

P2: pH 5.0, I 0.5 A, Na<sub>2</sub>SO<sub>4</sub> 3 g/L, O<sub>2</sub> 0.5 MPa, T 25 °C.

\* treatment time: 30 min

\*\* treatment time: 120 min.

Table S2. The main degradation intermediates of X-GRL by two processes

| Code | m/z | Molecular formula                            | Name                          | Structure                                                                            | 1 | 2 |
|------|-----|----------------------------------------------|-------------------------------|--------------------------------------------------------------------------------------|---|---|
| M1   | 197 | C <sub>14</sub> H <sub>15</sub> N            | Benzenamine,N-phenylmethylene | 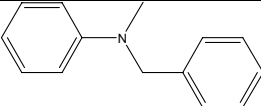   | √ | √ |
| M2   | 106 | C <sub>7</sub> H <sub>8</sub> N              | N-methyl-aniline              |    | √ | √ |
| M3   | 106 | C <sub>7</sub> H <sub>6</sub> O              | Benzaldehyde                  |    | √ | √ |
| M4   | 108 | C <sub>7</sub> H <sub>8</sub> O              | 2-methyl-phenol               |    | √ |   |
| M5   | 122 | C <sub>7</sub> H <sub>6</sub> O <sub>2</sub> | Benzoic acid                  |   | √ |   |
| M6   | 122 | C <sub>7</sub> H <sub>6</sub> O <sub>2</sub> | <i>o</i> -hydroquinone        |  | √ |   |
| M7   | 122 | C <sub>7</sub> H <sub>6</sub> O <sub>2</sub> | <i>o</i> -benzoquinone        |  | √ |   |
